# Supplementary material for: High-capacity strong cation exchanger prepared from an inactivated immobilized enzyme and its application to the removal of methylene blue from water
Source: Royal Society of Chemistry journal article supplement (doi:10.1039/c6ra10243c), 2016-01-01
Supplement: c6ra10243c1.pdf [file c6ra10243c1.pdf]

# High-Capacity Strong Cation Exchanger Prepared From An Inactivated Immobilized Enzyme And Its Application To The Removal Of Methylene Blue From Water

Jingxiang Yuan, Chaozhan Wang\*, Yinmao Wei\*

*Synthetic and Natural Functional Molecule Chemistry of Ministry of Education Key Laboratory,*

*College of Chemistry and Materials Science, Northwest University, Xi'an 710127, China*

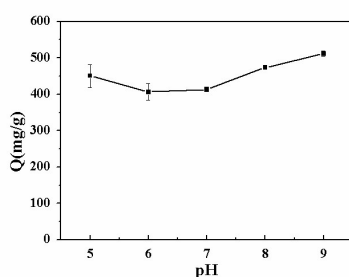

**Fig. S1. Effect of pH on the adsorption of MB**

(Initial MB concentration: 2 g/L; adsorbent dosage: 2 g/L; temperature:  $298 \pm 2$  K;  
equilibrium time : 30 min)

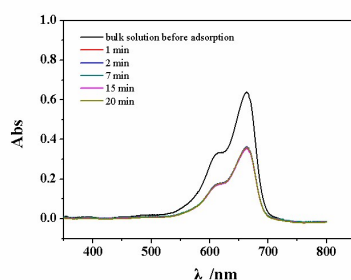

**Fig. S2. Spectral changes before and after adsorption**

(Initial MB concentration: 2 g/L; adsorbent dosage: 2 g/L; pH 7.0; temperature:  $298 \pm 2$  K;

Spectra were traced after diluted the solutions 625-fold.)

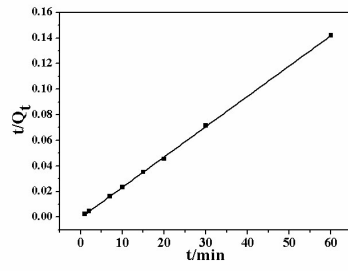

**Fig. S3. Pseudo- second order kinetics for adsorption of MB**

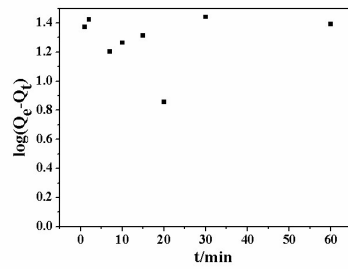

**Fig. S4. Pseudo-first order kinetics for adsorption of MB**

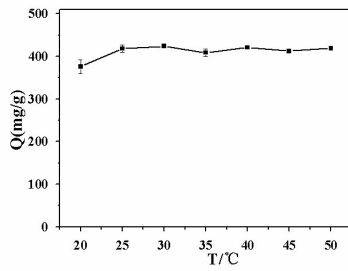

**Fig. S5. Effect of temperature on the adsorption of MB**

(Initial MB concentration, 2 g/L; adsorbent dose, 2 g/L; pH 7.0; adsorption time, 1 min.)

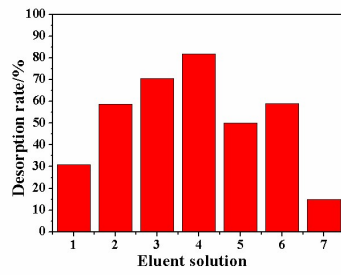

**Fig. S6. Desorption of Adsorbed dyes from cation exchanger in varying composition of eluent solution**

(Initial MB concentration, 2 g/L; adsorbent dose, 2 g/L; pH 7.0; temperature, 298 K±2)

- |                                |                               |
|--------------------------------|-------------------------------|
| 1, 1 mol/L HCl + 30% ethanol ; | 2, 2 mol/L HCl + 30% ethanol; |
| 3, 3 mol/L HCl + 30% ethanol;  | 4, 5 mol/L HCl + 30% ethanol; |
| 5, 1 mol/L HCl + 50% ethanol;  | 6, 1 mol/L HCl +70% ethanol;  |
| 7, 1 mol/L HCl + 1 mol/L NaCl  |                               |
